# Supplementary material for: Lotus rhizome-like S/N–C with embedded WS2 for superior sodium storage
Source: Royal Society of Chemistry journal article supplement (doi:10.1039/c9ta09373g), 2019-01-01
Supplement: c9ta09373g1.pdf [file c9ta09373g1.pdf]

## Supporting information

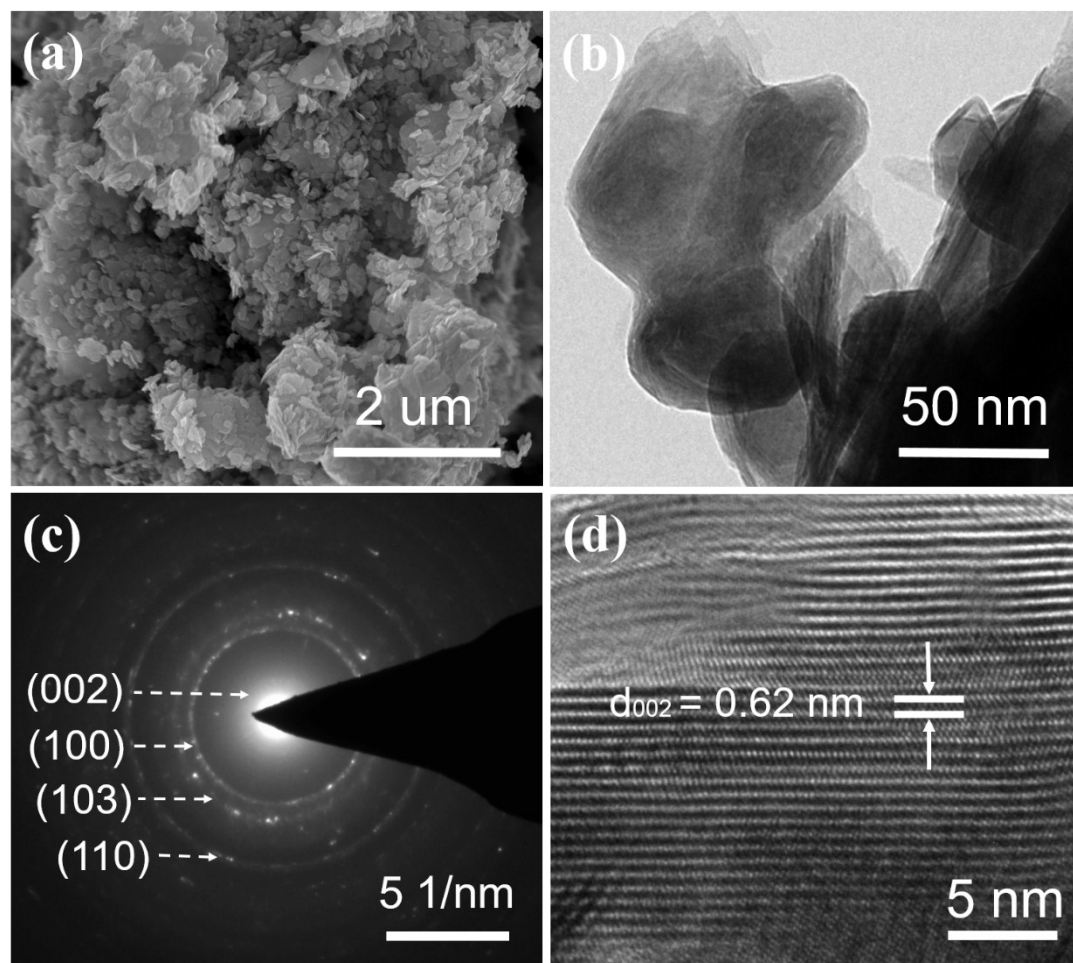

**Figure S1** (a) low-resolution SEM image and (b) TEM image of pure WS<sub>2</sub>; (c) electron diffraction pattern, and (d) high-resolution TEM image of pure WS<sub>2</sub>.

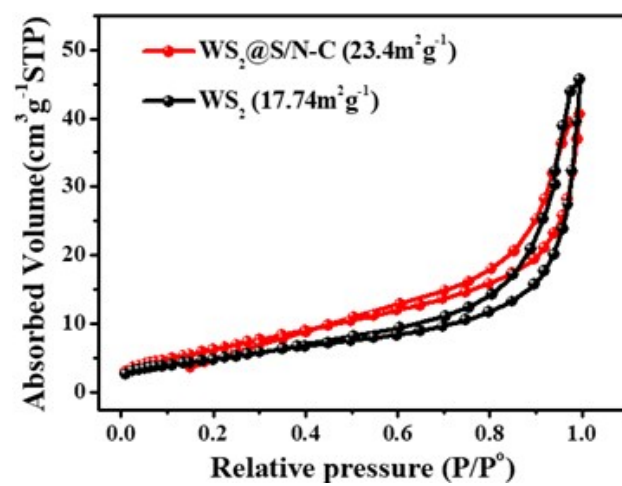

**Figure S2** Nitrogen adsorption and desorption isotherms of WS<sub>2</sub>@S/N-C nanofibers and pure WS<sub>2</sub>.

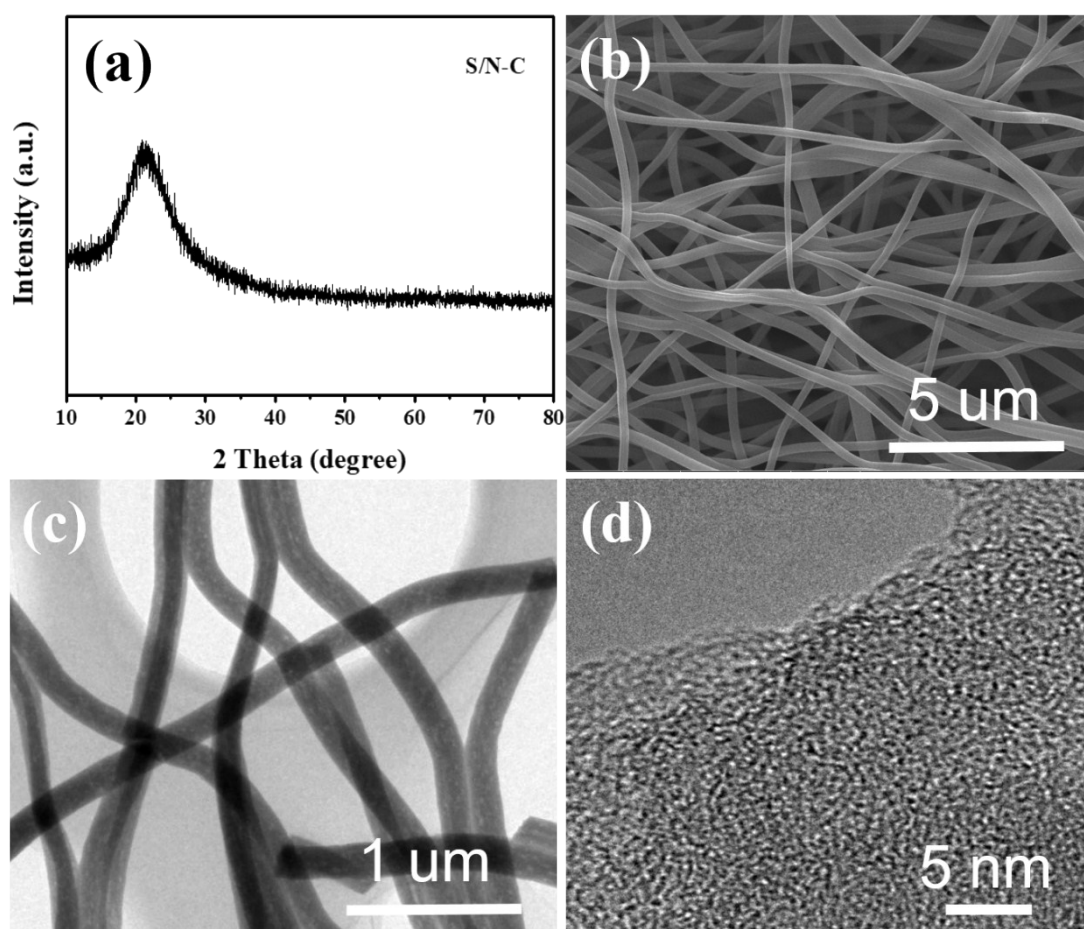

**Figure S3** Characterizations of S/N-C nanofibers: (a) XRD pattern; (b) SEM image; (c) TEM image and (d) HR-TEM image.

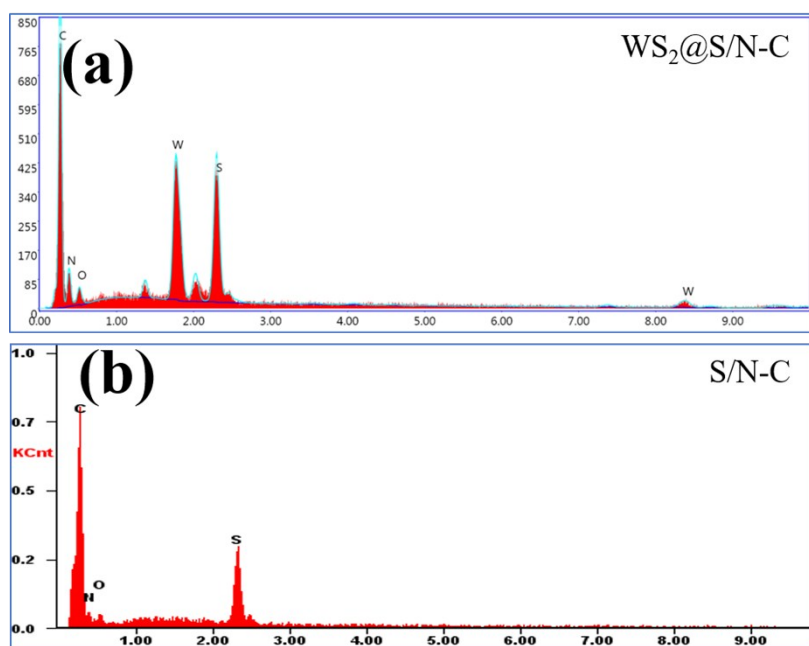

**Figure S4** EDS spectrum of (a)  $WS_2@S/N-C$  nanofibers and (b) S/N-C nanofibers.

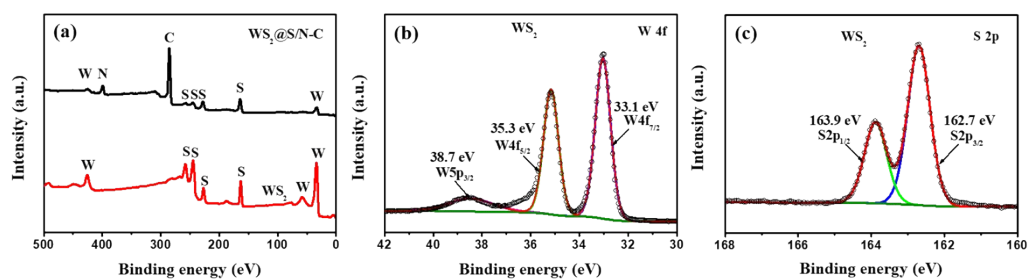

**Figure S5** (a) XPS full survey spectra of WS<sub>2</sub>@S/N-C nanofibers and pure WS<sub>2</sub>; (b and c) High-resolution XPS spectra of W and S elements for pure WS<sub>2</sub>.

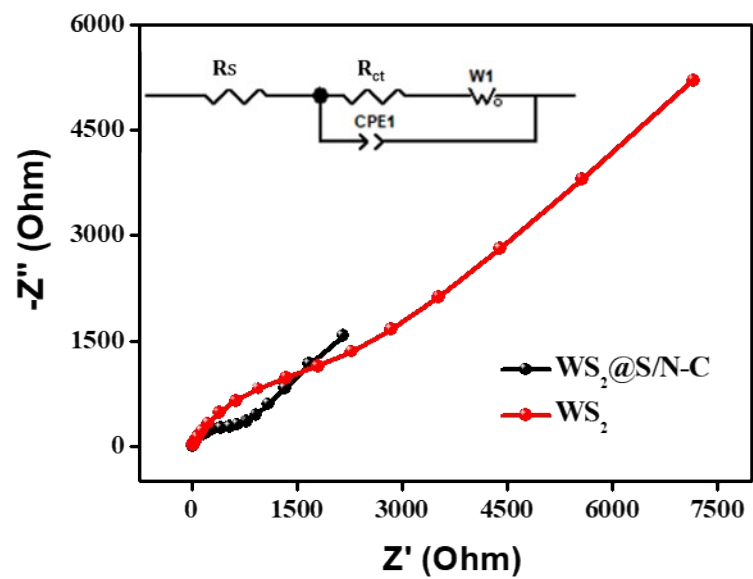

**Figure S6** EIS spectra for WS<sub>2</sub>@S/N-C and pure WS<sub>2</sub> after cycling for 1 cycle at 0.1 A g<sup>-1</sup>. The inset is the equivalent circuit.

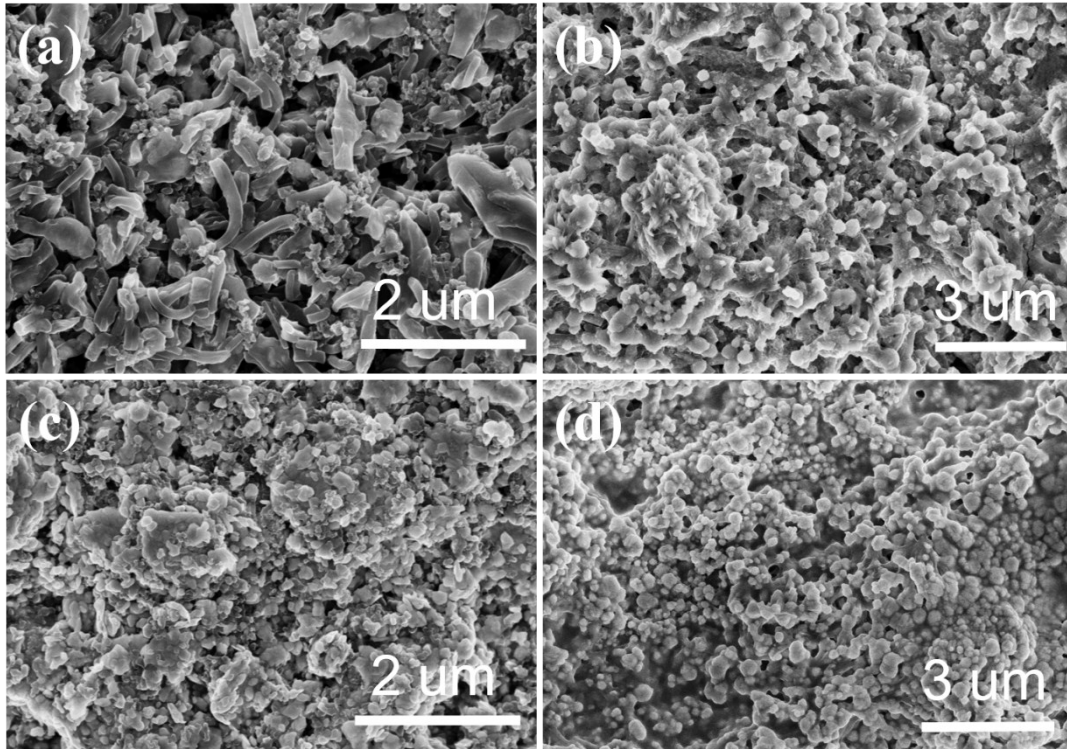

**Figure S7** Low-resolution SEM images of WS<sub>2</sub>@S/N-C electrode: (a) fresh electrode and (b) cycled electrode after 100 cycles; low-resolution SEM images of WS<sub>2</sub> electrode: (c) fresh electrode and (d) cycled electrode after 100 cycles.

**Table S1.** The adsorption behavior of Na on pristine WS<sub>2</sub>.

| Adsorption sites<br>WS <sub>2</sub> | I (S-top) | II (Hollow) | III (W-top) |
|-------------------------------------|-----------|-------------|-------------|
| E <sub>ad</sub> (eV)                | -0.494    | -0.744      | -0.759      |
| Q <sub>Na</sub> ( e )               | 0.56      | 0.74        | 0.76        |

**Table S2.** The adsorption behavior of Na on WS<sub>2</sub>@S/N-C.

| Adsorption sites<br>WS <sub>2</sub> @S/N-C | I (S-top) | II (Hollow) | III (W-top) |
|--------------------------------------------|-----------|-------------|-------------|
| E <sub>ad</sub> (eV)                       | -0.897    | -1.168      | -1.208      |
| Q <sub>Na</sub> ( e )                      | 0.65      | 0.79        | 0.79        |
